# Supplementary material for: Dehydrofluorination Process of Poly(vinylidene difluoride) PVdF-Based Gel Polymer Electrolytes and Its Effect on Lithium-Sulfur Batteries
Source: MDPI journal article supplement (doi:10.3390/gels9040336), 2023-04-14
Supplement: s1 [file s1]

# Dehydrofluorination Process of Poly(vinylidene difluoride) PVdF-Based Gel Polymer Electrolytes and Its Effect on Lithium-Sulfur Batteries

**Julen Castillo <sup>1,2</sup>, Adrián Robles-Fernandez <sup>1</sup>, Rosalía Cid <sup>1</sup>, José Antonio González-Marcos <sup>2</sup>, Michel Armand <sup>1</sup>, Daniel Carriazo <sup>1,3</sup>, Heng Zhang <sup>4</sup> and Alexander Santiago <sup>1,\*</sup>**

<sup>1</sup> Centre for Cooperative Research on Alternative Energies (CIC energiGUNE), Basque Research and Technology Alliance (BRTA), 01510 Vitoria-Gasteiz, Spain

<sup>2</sup> Department of Chemical Engineering, Faculty of Science and Technology, University of the Basque Country UPV/EHU, Campus de Leioa, Barrio Sarriena, ES-48940 Leioa, Bizkaia, Spain

<sup>3</sup> IKERBASQUE, Basque Foundation for Science, 48013 Bilbao, Spain

<sup>4</sup> Key Laboratory of Material Chemistry for Energy Conversion and Storage (Ministry of Education), School of Chemistry and Chemical Engineering, Huazhong University of Science and Technology, Wuhan 430074, China

\* Correspondence: [asantiago@cicenergigune.com](mailto:asantiago@cicenergigune.com);

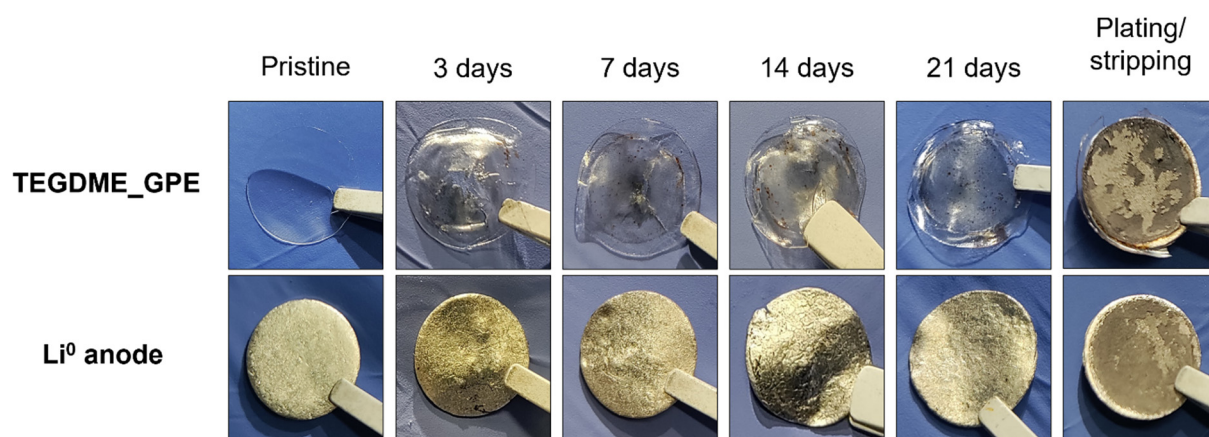

**Figure S1.** The aging test of TEGDME\_GPE in contact with Li<sup>0</sup> anode.

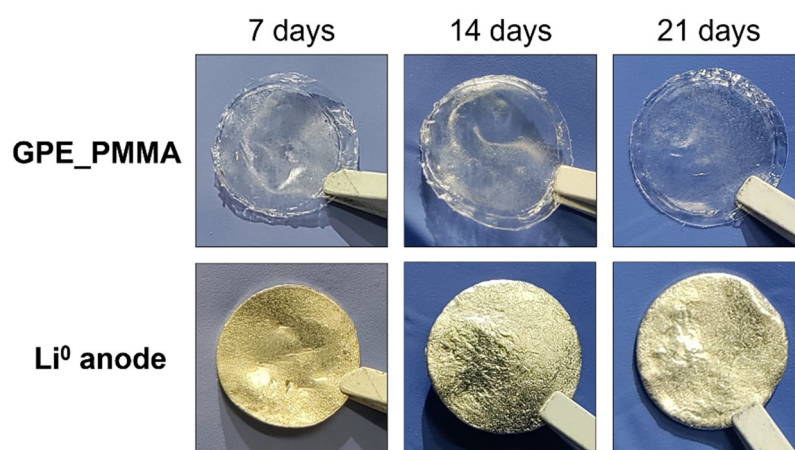

**Figure S2.** The aging test of the PMMA/PEGDME\_GPE after contact with Li<sup>0</sup> anode.

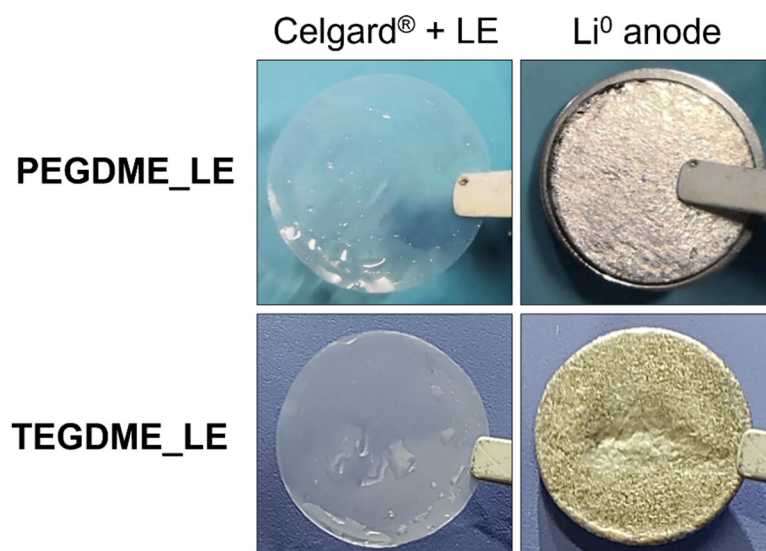

**Figure S3.** The aging test of PEGDME\_LE and TEGDME\_LE after 14 days in contact with the Li<sup>0</sup> anode.

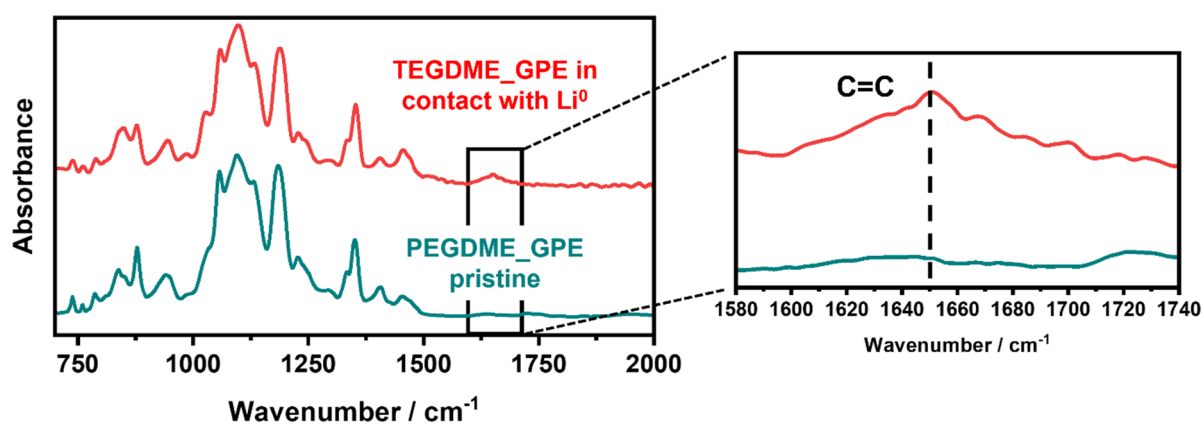

**Figure S4.** ATR-FTIR spectra of the TEGDME\_GPE-based electrolyte before and after being in contact with Li<sup>0</sup> anode.

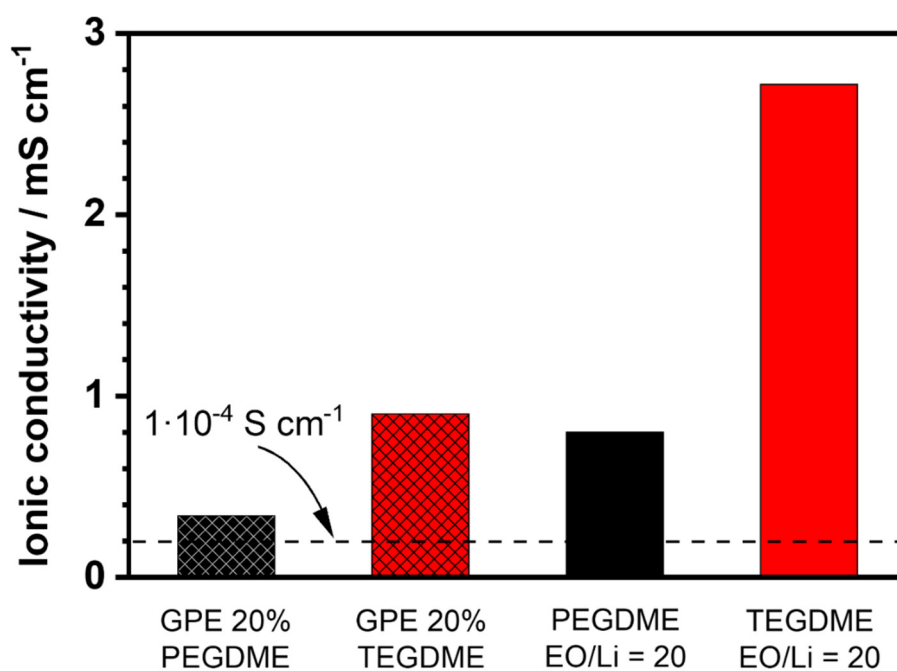

**Figure S5.** Ionic conductivity at RT of both PEGDME\_GPE and TEGDME\_GPE and their corresponding liquid electrolyte counterparts.

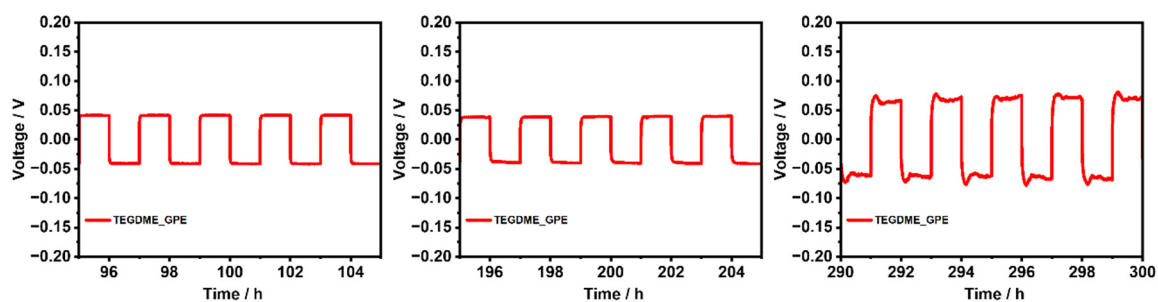

**Figure S6.** Enlarged symmetrical cell voltage profile data of TEGDME\_GPE at different operation times.
